# Supplementary material for: Induction of Corneal Endothelial-like Cells from Mesenchymal Stem Cells of the Umbilical Cord
Source: MDPI journal article supplement (doi:10.3390/ijms232315408), 2022-12-06
Supplement: s1 [file s1]

**Table S1.** Primer sequences used for PCR.

| Gene                       | Primer sequence                              |
|----------------------------|----------------------------------------------|
| AQP1                       | F: 5'-ATGGCCAGCGAGTTCAAGAAGAAG-3'            |
|                            | R: 5'-GGTTCTGCCCTGGGCTTCAAAT-3'              |
| COL8A1                     | F: 5'-CCT GGG TCA GCA AGT ACC TC-3'          |
|                            | R: 5'-TTG TTC CCC TCG TAA ACT GG-3'          |
| COL8A2                     | F: 5'-CTG GTT TGG ATG GGC TTC CT-3'          |
|                            | R: 5'-CTC ATC GAA GGC CCC AGG AG-3'          |
| ATP1A1                     | F: 5'-ACA GAC TTG AGC CGG GGA TTA-3'         |
|                            | R: 5'-TCC ATT CAG GAG TAG TGG GAC-3'         |
| GAPDH                      | F: 5'-GTATCGTGGAAGGACTCATGACCA-3'            |
|                            | R: 5'-TAGAGGCAGGGATGATGTTCTGGA-3'            |
| Human<br>mitochondrial DNA | mt8709F: 5'-CAA CAC TAA AGG ACG AAC CTG A-3' |
|                            | mt10171R: 5'-TCG TAA GGG GTG GAT TTT TC-3'   |
